# Supplementary material
Source: publisher figshare collection journal article supplement (https://geolsoc.figshare.com/ndownloader/files/31316033)

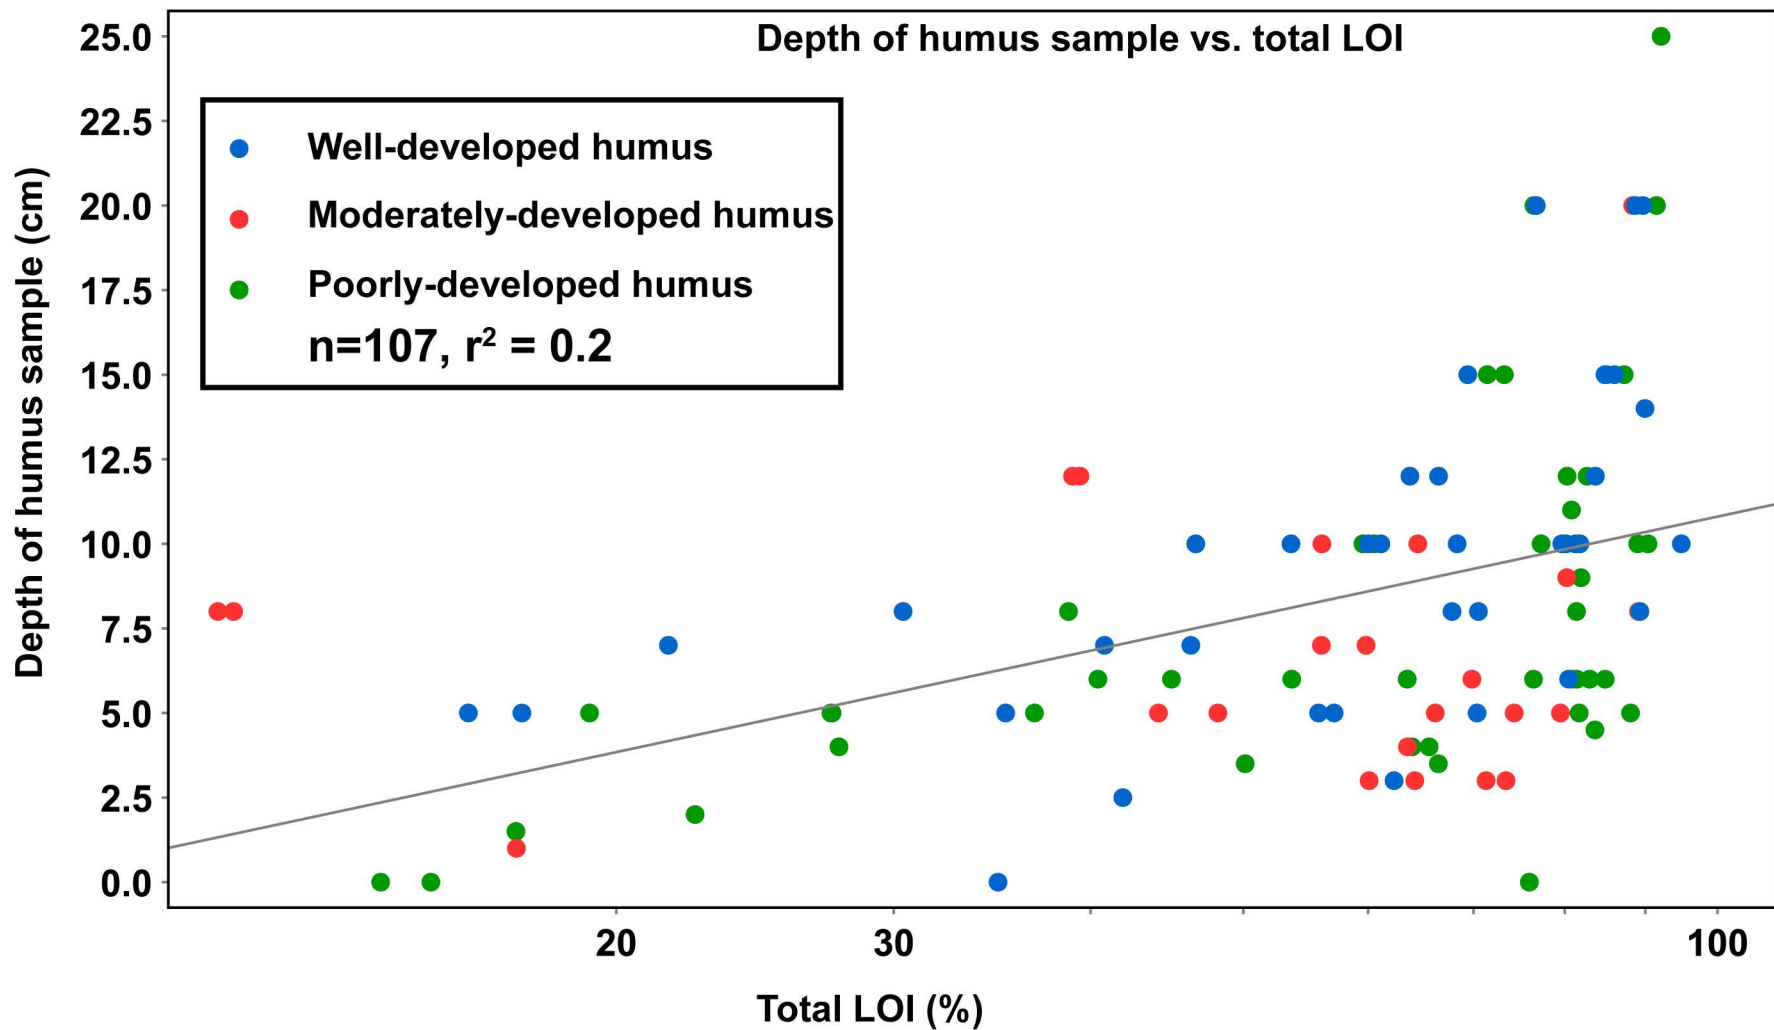

Supplement: Supplementary file 1 [file 31316033]
